# Supplementary material
Source: PubMed Central journal article supplement (PMC3398736)
Supplement: NIHMS389966-supplement-01.pdf [file NIHMS389966-supplement-01.pdf]

# Figure S1 A & C

**A**

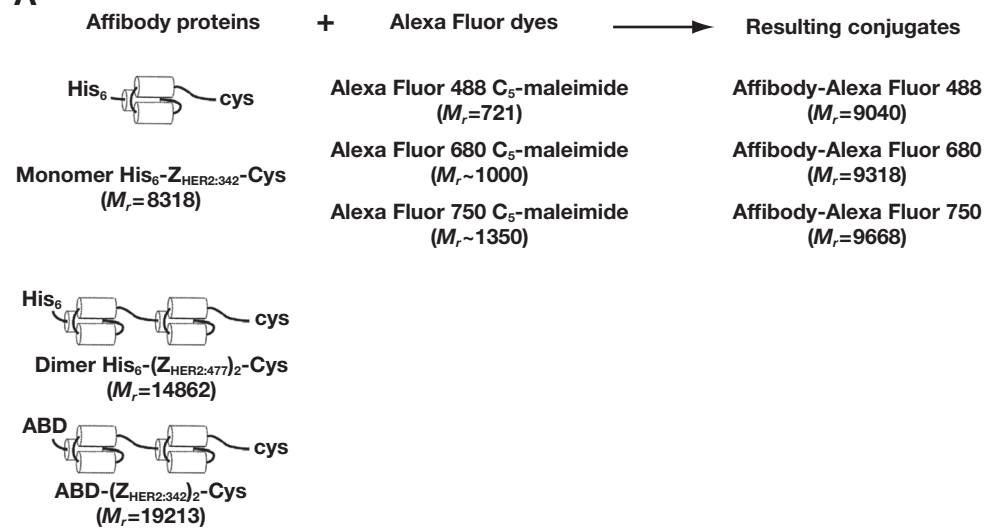

**C**

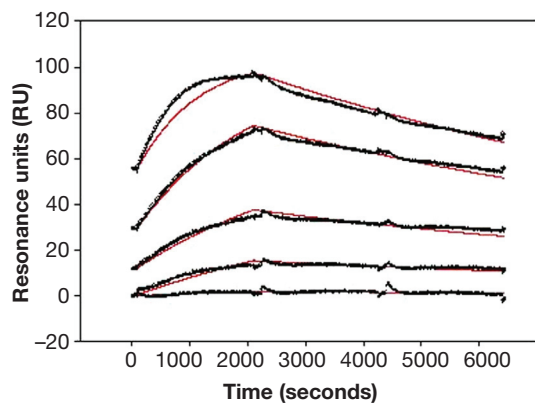

Figure S1 B

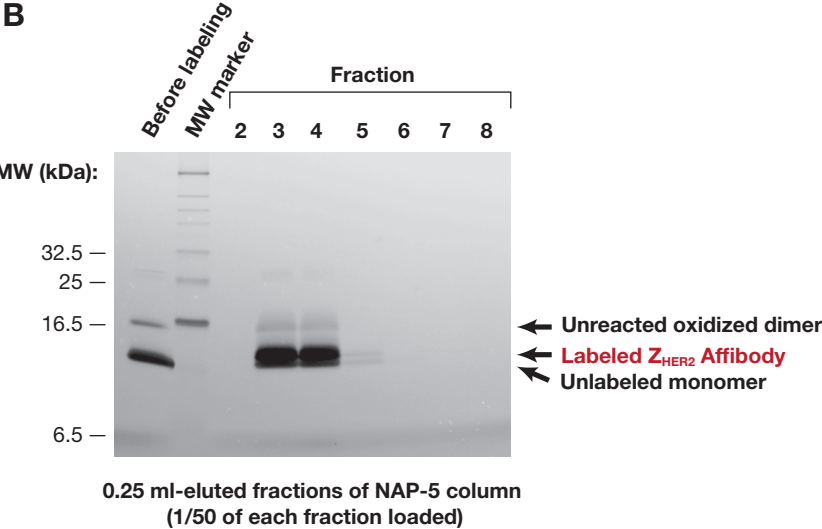

Type of file: table

Label: tables and legends

Filename: Supplementary Tables and Figure legend.pdf

**Supplementary Table S1.** FACS analyses after labeling with Affibody-Alexa Fluor 488 conjugate

| <b>Labeling of SKBR-3 cells</b>                 | <b>% of control</b> |
|-------------------------------------------------|---------------------|
| Alexa Fluor 488 Dye (—)                         | 1.1 ± 0.5           |
| 5 nM Affibody-Alexa Fluor 488 conjugate (—)     | 94.6 ± 2.7          |
| 50 nM Affibody-Alexa Fluor 488 conjugate (—)    | 98.9 ± 0.6          |
| 5 nM conjugate + excess unlabeled Affibody (—)  | 0.8 ± 0.3           |
| 50 nM conjugate + excess unlabeled Affibody (—) | 1.1 ± 0.7           |

| <b>Labeling of U251 cells</b>                   | <b>% of control</b> |
|-------------------------------------------------|---------------------|
| Alexa Fluor 488 Dye (—)                         | 0.9 ± 0.4           |
| 5 nM Affibody-Alexa Fluor 488 conjugate (—)     | 2.2 ± 1.5           |
| 50 nM Affibody-Alexa Fluor 488 conjugate (—)    | 5.3 ± 2.2           |
| 5 nM conjugate + excess unlabeled Affibody (—)  | 1.0 ± 0.7           |
| 50 nM conjugate + excess unlabeled Affibody (—) | 3.4 ± 1.1           |

NOTE: Percentages of cells under the gate designated as M1 in each sample shown in Fig. 2A are presented as mean ± SD from three independent experiments with duplicate samples.

**Supplementary Table S2.** FACS analyses after double labeling with Affibody-Alexa Fluor 488 and

Trastuzumab-Alexa Fluor 680 conjugates

| <b>Double labeling of SKBR-3 cells</b>                                          | <b>Both bound</b> | <b>Trastuzumab-Alexa Fluor 680 bound</b> | <b>Affibody-Alexa Fluor 488 bound</b> | <b>None bound</b> |
|---------------------------------------------------------------------------------|-------------------|------------------------------------------|---------------------------------------|-------------------|
| 1 nM Affibody-Alexa Fluor 488 +<br>10 nM Trastuzumab-Alexa Fluor 680 conjugates | 98.3 ± 1.1        | 0.4 ± 0.3                                | 1.1 ± 0.4                             | 0.2 ± 0.1         |
| Both conjugates + excess unlabeled Affibody                                     | 1.6 ± 0.5         | 97.0 ± 1.3                               | 0.8 ± 0.1                             | 0.5 ± 0.3         |
| Both conjugates + excess unlabeled Trastuzumab                                  | 0.3 ± 0.2         | 0.5 ± 0.2                                | 98.3 ± 0.9                            | 0.8 ± 0.3         |
| Both conjugates + excess Affibody/Trastuzumab                                   | 0.6 ± 0.2         | 0.4 ± 0.2                                | 1.5 ± 0.4                             | 97.4 ± 0.1        |
| <b>Double labeling of U251 cells</b>                                            |                   |                                          |                                       |                   |
| 1 nM Affibody-Alexa Fluor +<br>10 nM Trastuzumab-Alexa Fluor 680 conjugates     | 0.2 ± 0.1         | 0.3 ± 0.2                                | 0.7 ± 0.3                             | 98.7 ± 0.9        |
| Both conjugates + excess unlabeled Affibody                                     | 0.2 ± 0.2         | 0.4 ± 0.2                                | 0.2 ± 0.1                             | 99.2 ± 0.5        |
| Both conjugates + excess unlabeled Trastuzumab                                  | 0.1 ± 0.1         | 0.2 ± 0.1                                | 0.6 ± 0.4                             | 99.0 ± 0.7        |
| Both conjugates + excess Affibody/Trastuzumab                                   | 0.3 ± 0.1         | 0.1 ± 0.1                                | 0.6 ± 0.5                             | 98.9 ± 0.8        |

NOTE: Percentages of cells in each gate shown in Fig. 2B are presented as mean ± SD from three independent experiments with duplicate samples.

## Supplementary Figure Legend

**Supplementary Figure S1.** *A.* Schematic representation of conjugation chemistry. *B.* Typical analysis of conjugation reactions using SDS-PAGE and silver staining. *C.* Surface plasmon resonance analysis of Affibody  $Z_{\text{HER2:342}}$ -Alexa Fluor 750 binding to the extracellular domain of HER2 using the Biacore instrument to measure affinity and binding kinetics. Affibody  $Z_{\text{HER2:342}}$  and  $Z_{\text{HER2:342}}$ -Alexa Fluor 750 were diluted 2-fold serially from 500 to 7.8 pmol/L and injected, followed by two injections of buffer as described in “Materials and Methods”. Concatenated data from Affibody  $Z_{\text{HER2:342}}$ -Alexa Fluor 750 binding were shown here. The red lines represent the fitted lines according to a 1:1 binding model.
